# Supplementary material for: Airway surface hyperviscosity and defective mucociliary transport by IL-17/TNF-α are corrected by β-adrenergic stimulus
Source: PubMed Central journal article supplement (PMC9746827; doi:10.1172/jci.insight.164944), 2022-11-22
Supplement: jciinsight-7-164944-s234.pdf [file jciinsight-7-164944-s234.pdf]

**Airway surface hyperviscosity and defective mucociliary transport by IL-17/TNF- $\alpha$  are corrected by beta-adrenergic stimulus**

Daniela Guidone, Martina Buccrossi, Paolo Scudieri, Michele Genovese, Sergio Sarnataro, Rossella De Cegli, Federico Cresta, Vito Terlizzi, Gabrielle Planelles, Gilles Crambert, Isabelle Sermet, Luis J.V. Galiotta

**Supplementary Figures 1-7**

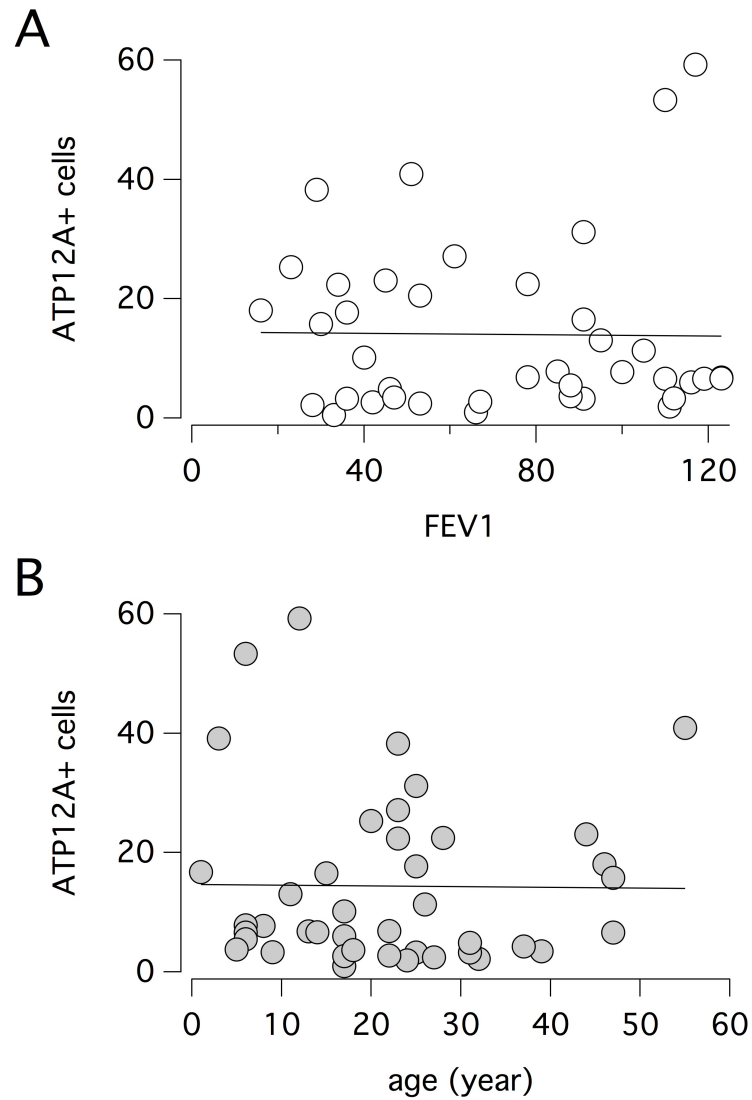

**Supplementary Figure 1. Analysis of ATP12A expression in nasal epithelial cells freshly collected from CF patients.** Each symbol reports the average value of a single patient. **(A)** Percentage of ATP12A+ cells vs. FEV1. **(B)** Percentage of ATP12A+ cells vs. age. Straight lines show the best linear fit of data.

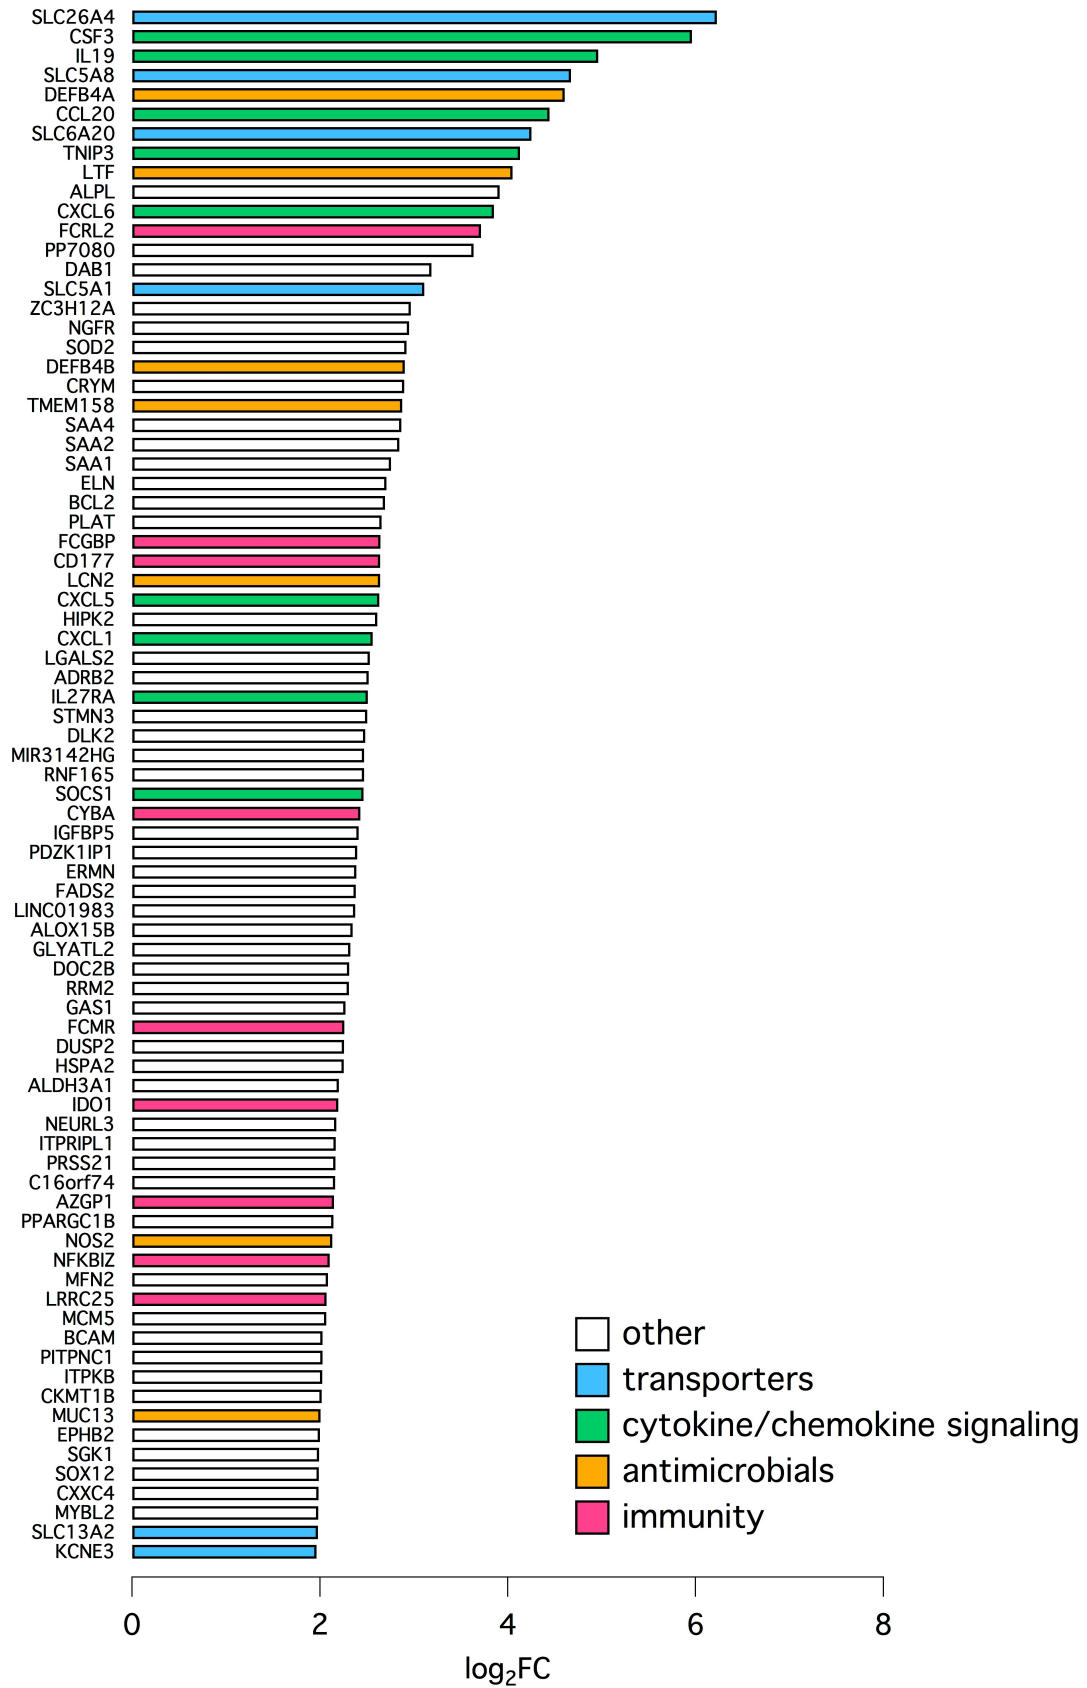

**Supplementary Figure 2. Top 80 genes upregulated by IL-17/TNF- $\alpha$  combination in cultured bronchial epithelia.** The bar graph shows the extent of expression of indicated genes as determined by bulk RNAseq in non-CF cultured bronchial epithelia. Color codes indicate gene function.

**Color Key**

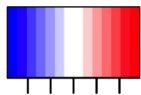

Row Z-Score

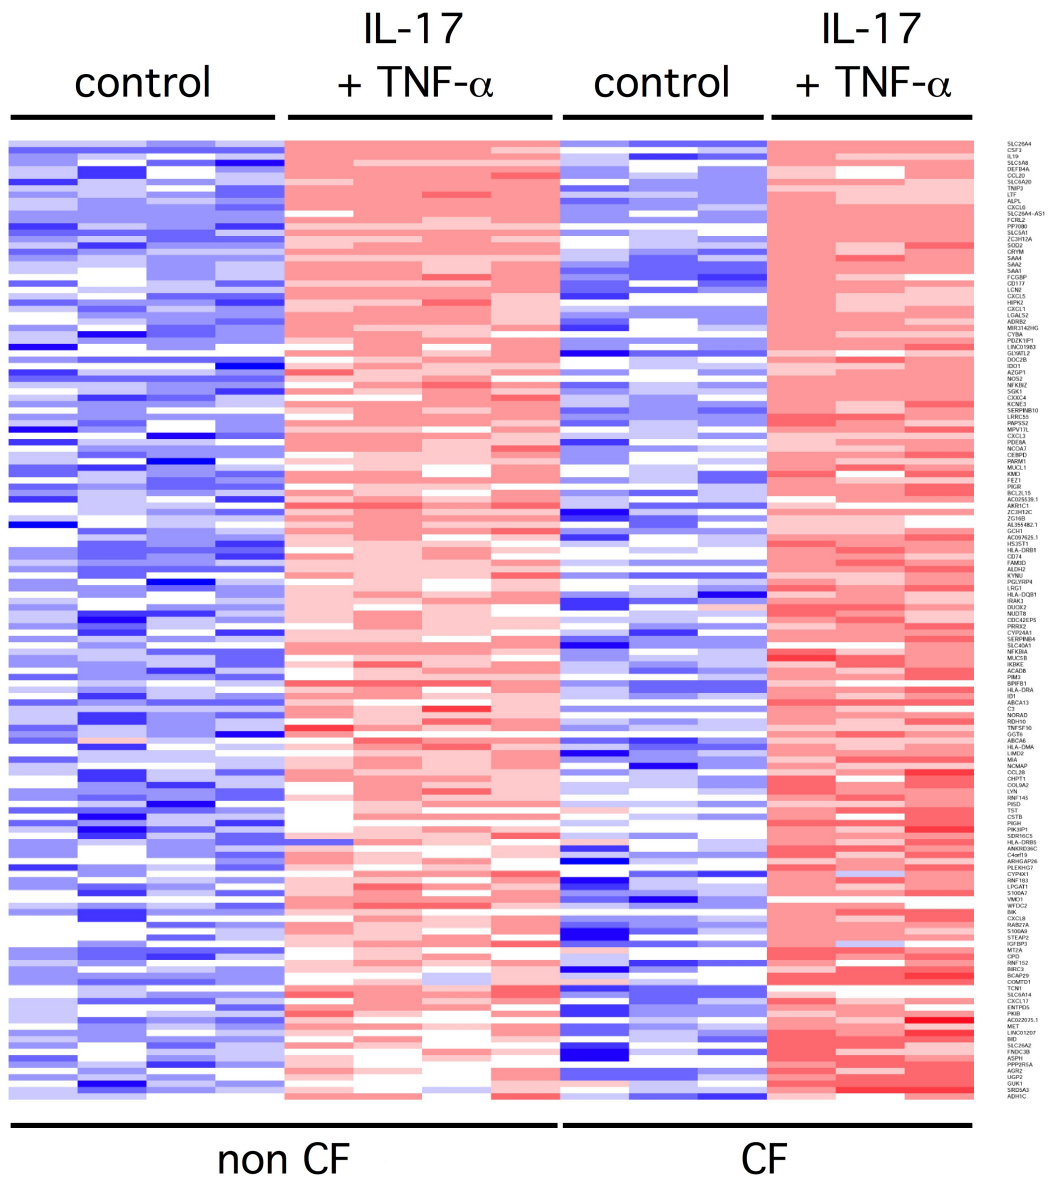

**Supplementary Figure 3. Comparison of gene expression changes induced by IL-17/TNF- $\alpha$  in non-CF and CF cultured bronchial epithelia.** The heat maps show the change in expression for the top 80 upregulated genes.

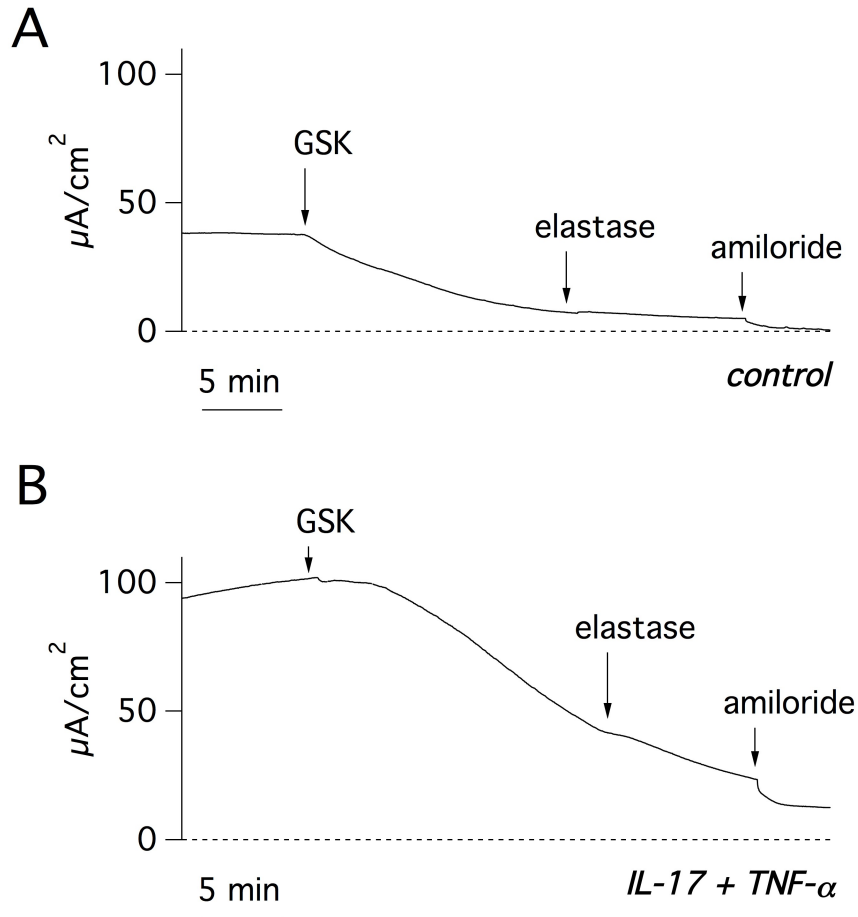

**Supplementary Figure 4. Lack of elastase effect in epithelia treated with GSK650394.** The figure shows representative short-circuit current recordings from cultured bronchial epithelia treated for 72 h in control conditions (**A**) or with  $IL-17/TNF-\alpha$  (**B**).

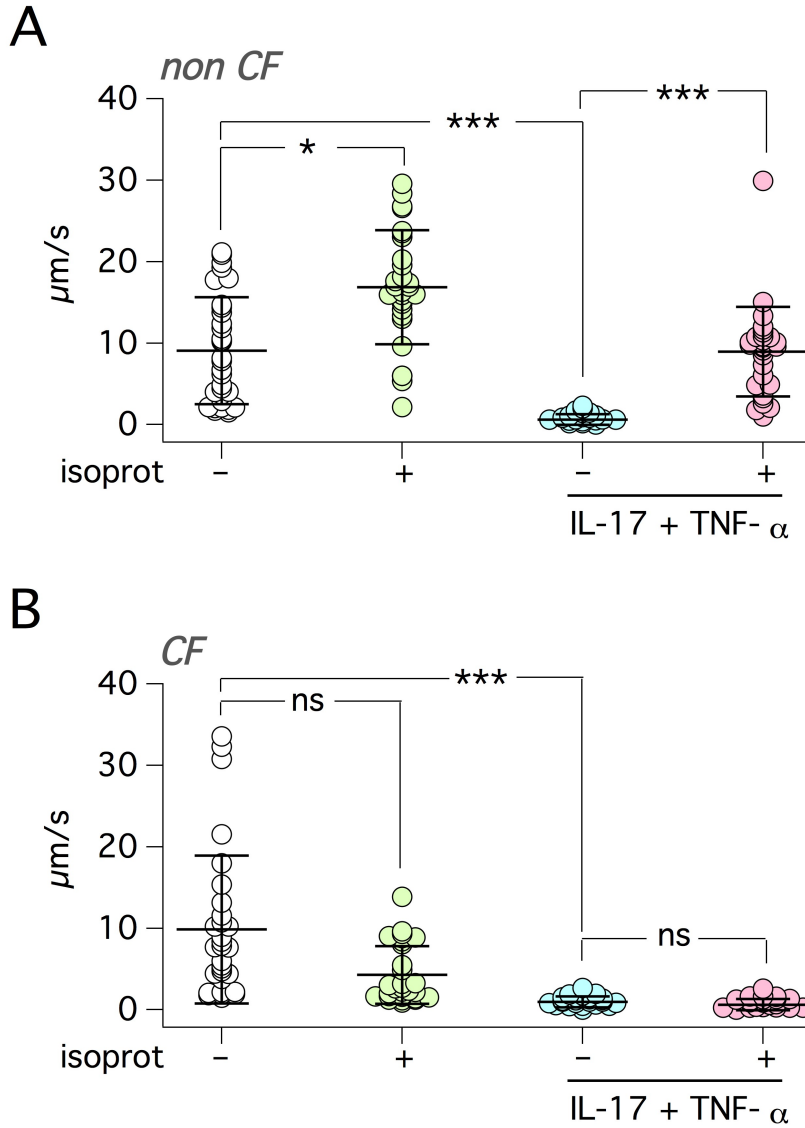

**Supplementary Figure 5. Analysis of mucociliary transport by videomicroscopy.** The graphs report the velocity of microbeads on non-CF (**A**) and CF (**B**) cultured bronchial epithelia. Epithelia were treated for 72 h with/without IL-17/TNF- $\alpha$  and then stimulated for 3 h with isoproterenol (100 nM). \*,  $p < 0.05$ ; \*\*,  $p < 0.01$ ; \*\*\*,  $p < 0.001$ ; ns, not significant (Kruskal-Wallis and Dunn's test).

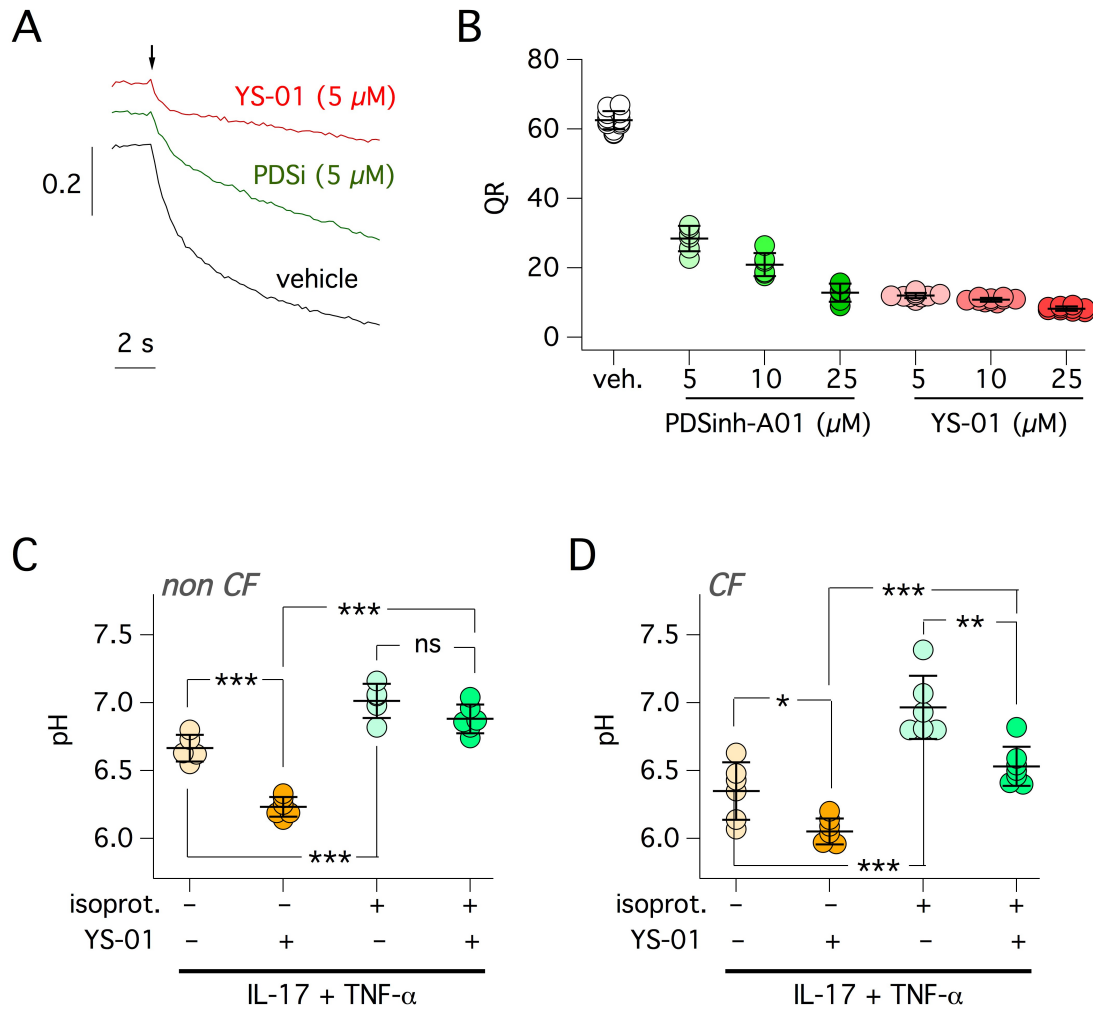

**Supplementary Figure 6. Evaluation of SLC26A4 inhibitors.** (A) Representative traces showing quenching of halide-sensitive yellow fluorescent protein (HS-YFP) caused by extracellular addition of  $\text{I}^-$  (arrow) in FRT cells expressing SLC26A4. SLC26A4 inhibitors (YS-01; PDS<sub>inh</sub>-A01, PDSi) slow down  $\text{I}^-$  uptake and hence HS-YFP quenching. (B) Summary of data showing quenching rate (QR) of HS-YFP with vehicle and SLC26A4 inhibitors at the indicated concentrations. (C, D) Apical pH measured with the large volume ex situ assay in non-CF and CF cultured bronchial epithelia treated for 72 h with the IL-17/TNF- $\alpha$  combination. Where indicated, in the last 3 h, epithelia were stimulated with/without isoproterenol (100 nM) in the absence/presence of YS-01 (5  $\mu\text{M}$ ). \*,  $p < 0.05$ ; \*\*,  $p < 0.01$ ; \*\*\*,  $p < 0.001$ ; ns, not significant (ANOVA with Tukey's post hoc test).

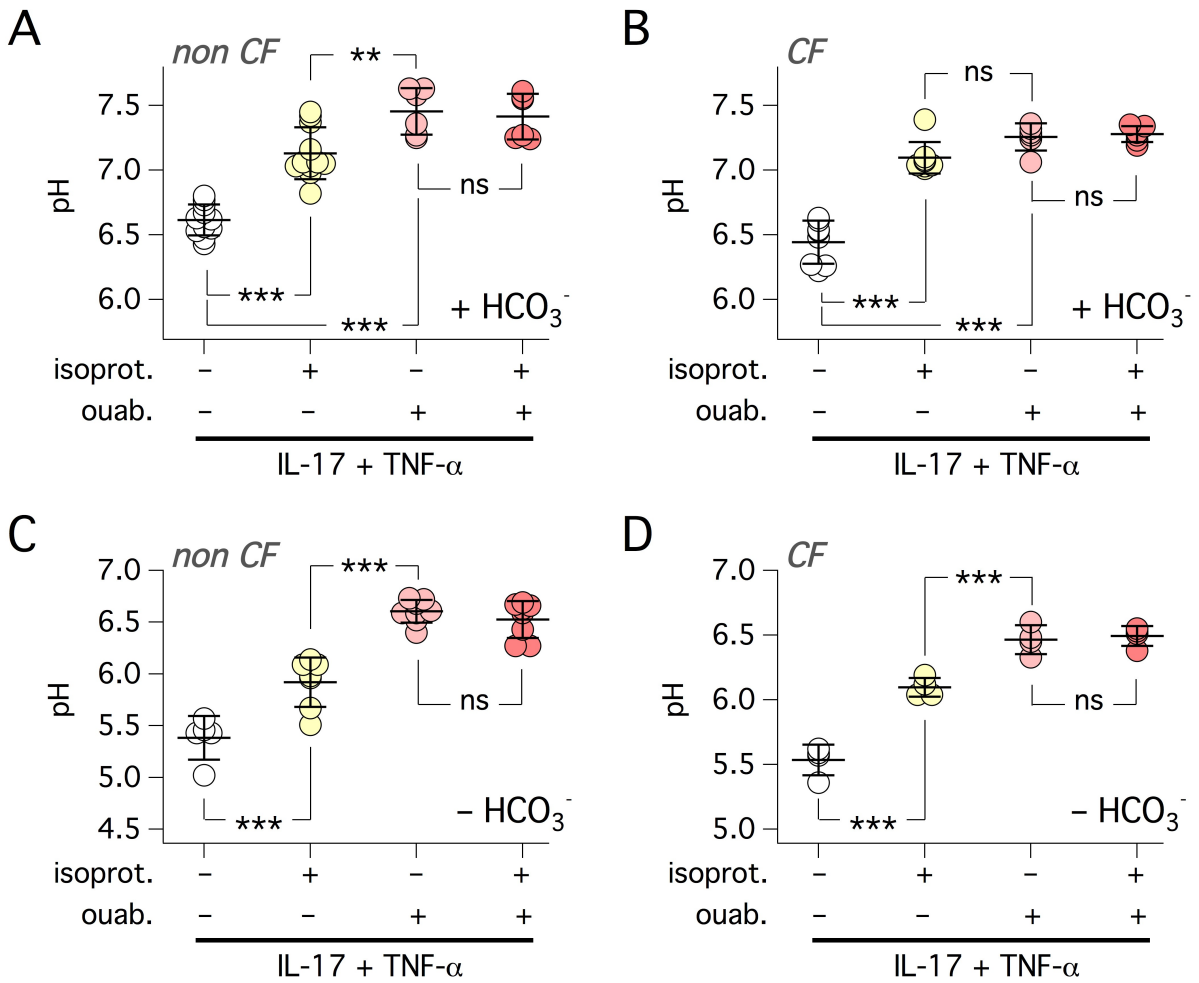

**Supplementary Figure 7. Analysis of isoproterenol effect on apical pH.** The graphs report the apical pH (large volume ex situ assay) measured in non-CF and CF bronchial epithelia kept in HCO<sub>3</sub><sup>-</sup>-rich (**A**, **B**) or HCO<sub>3</sub><sup>-</sup>-free (**C**, **D**) basolateral media. All epithelia were treated for 72 h with IL-17/TNF- $\alpha$ . Where indicated, epithelia were stimulated with basolateral isoproterenol (100 nM) in the absence/presence of ouabain (200  $\mu$ M). \*\*,  $p < 0.01$ ; \*\*\*,  $p < 0.001$ ; ns, not significant (ANOVA with Tukey's post hoc test).
